# Supplementary material
Source: PubMed Central journal article supplement (PMC6555640)
Supplement: NIHMS1029384-supplement-1.pdf [file NIHMS1029384-supplement-1.pdf]

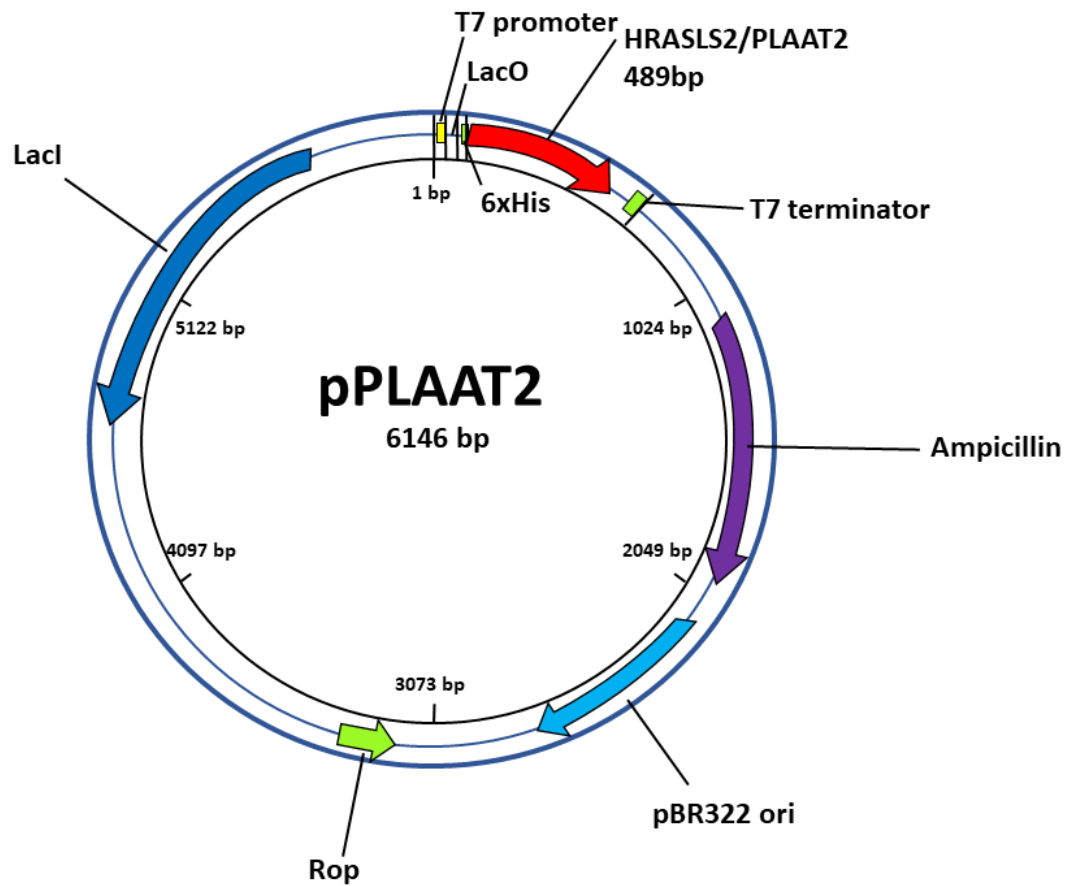

**Supplemental Figure 1.** Map of pPLAAT2, plasmid for expression of the human NAPE acyltransferase HRASLS-2 (PLAAT2) in *E. coli*.
